# Supplementary material for: Rheumatoid factor and anti-citrullinated protein antibody positivity, but not level, are associated with increased mortality in patients with rheumatoid arthritis: results from two large independent cohorts
Source: Springer Nature journal article supplement (doi:10.1186/s13075-014-0483-3), 2014-12-01
Supplement: MOESM1 [file 9783394]

**Table S1:** Univariate and multivariate Cox proportional hazard models comparing RF/ACPA high/low positive vs negative

|                              | NOAR       |           |                    |           |               |             | Leiden EAC |           |                    |           |               |             |
|------------------------------|------------|-----------|--------------------|-----------|---------------|-------------|------------|-----------|--------------------|-----------|---------------|-------------|
|                              | Unadjusted |           | Age & sex adjusted |           | Multivariate* |             | Unadjusted |           | Age & sex adjusted |           | Multivariate* |             |
|                              | HR         | 95% CI    | HR                 | 95% CI    | HR            | 95% CI      | HR         | 95% CI    | HR                 | 95% CI    | HR            | 95% CI      |
| <b>RF/ACPA negative</b>      | ref        |           | ref                |           | ref           |             | ref        |           | ref                |           | ref           |             |
| <b>RF/ACPA low positive</b>  | 0.85       | 0.61-1.18 | 0.81               | 0.59-1.10 | 0.80          | 0.57-1.13   | 2.38       | 1.67-3.39 | 1.89               | 1.13-2.70 | 1.92          | 1.30-2.80   |
| <b>RF/ACPA high positive</b> | 1.58       | 1.35-1.84 | 1.51               | 1.29-1.77 | 1.44          | 1.21-1.70   | 1.44       | 1.11-1.86 | 1.63               | 1.26-2.12 | 1.42          | 1.06-1.91   |
| <b>Female gender</b>         | -          | -         | 0.70               | 0.60-0.81 | 0.77          | 0.65-0.91   | -          | -         | 0.73               | 0.57-0.92 | 0.72          | 0.54-0.94   |
| <b>Age at onset</b>          | -          | -         | 1.10               | 1.09-1.11 | 1.11          | 1.10-1.12   | -          | -         | 1.10               | 1.09-1.11 | 1.10          | 1.09-1.12   |
| <b>Smoking <i>Never</i></b>  | -          | -         | -                  | -         | ref           |             | -          | -         | -                  | -         | ref           |             |
| <b><i>Ever</i></b>           |            |           |                    |           | 0.98          | 0.81-1.18   |            |           |                    |           | 1.00          | 0.71-1.42   |
| <b><i>Current</i></b>        |            |           |                    |           | 1.68          | 1.34-2.10   |            |           |                    |           | 1.81          | 1.32-2.49   |
| <b>Inclusion year</b>        | -          | -         | -                  | -         | 0.96          | 0.94-0.98   | -          | -         | -                  | -         | 0.95          | 0.93-1.00   |
| <b>Inflammatory marker</b>   | -          | -         | -                  | -         | 1.003         | 1.002-1.005 | -          | -         | -                  | -         | 1.006         | 1.001-1.011 |

HR, hazard ratio; CI, confidence interval; RF, rheumatoid factor; ACPA, anti-citrullinated peptide antibodies; inflammatory marker = C-reactive protein in NOAR, = erythrocyte sedimentation rate in EAC

\*adjusted for age at symptom onset, sex, baseline smoking status, year of inclusion in cohort & inflammatory marker

**Table S2** Univariate and multivariate Cox proportional hazard models comparing RF and ACPA high/low positive vs negative

|      |                             | NOAR       |           |                    |           |               |             | Leiden EAC |           |                    |           |               |             |
|------|-----------------------------|------------|-----------|--------------------|-----------|---------------|-------------|------------|-----------|--------------------|-----------|---------------|-------------|
|      |                             | Unadjusted |           | Age & sex adjusted |           | Multivariate* |             | Unadjusted |           | Age & sex adjusted |           | Multivariate* |             |
|      |                             | HR         | 95% CI    | HR                 | 95% CI    | HR            | 95% CI      | HR         | 95% CI    | HR                 | 95% CI    | HR            | 95% CI      |
| RF   | <b>RF negative</b>          | ref        |           | ref                |           | ref           |             | ref        |           | ref                |           | ref           |             |
|      | <b>RF low positive</b>      | 0.90       | 0.68-1.20 | 0.81               | 0.62-1.06 | 0.80          | 0.59-1.07   | 2.13       | 1.55-2.91 | 1.67               | 1.21-2.29 | 1.62          | 1.16-2.26   |
|      | <b>RF high positive</b>     | 1.67       | 1.41-1.97 | 1.54               | 1.29-1.83 | 1.49          | 1.23-1.80   | 1.75       | 1.33-2.31 | 1.92               | 1.46-2.53 | 1.63          | 1.19-2.24   |
|      | <b>Female gender</b>        | -          | -         | 0.71               | 0.62-0.83 | 0.78          | 0.66-0.92   | -          | -         | 0.75               | 0.59-0.95 | 0.73          | 0.56-0.97   |
|      | <b>Age at onset</b>         | -          | -         | 1.10               | 1.09-1.11 | 1.11          | 1.10-1.12   | -          | -         | 1.10               | 1.09-1.11 | 1.11          | 1.09-1.12   |
|      | <b>Smoking <i>Never</i></b> | -          | -         | -                  | -         | ref           |             | -          | -         | -                  | -         | ref           |             |
|      | <b><i>Previous</i></b>      |            |           |                    |           | 0.98          | 0.81-1.19   |            |           |                    |           | 0.99          | 0.70-1.40   |
|      | <b><i>Current</i></b>       |            |           |                    |           | 1.66          | 1.33-2.08   |            |           |                    |           | 1.76          | 1.28-2.42   |
|      | <b>Inclusion year</b>       | -          | -         | -                  | -         | 0.96          | 0.94-0.98   | -          | -         | -                  | -         | 0.95          | 0.92-0.99   |
|      | <b>Inflammatory marker</b>  | -          | -         | -                  | -         | 1.003         | 1.002-1.005 | -          | -         | -                  | -         | 1.006         | 1.001-1.010 |
| ACPA | <b>ACPA negative</b>        | ref        |           | ref                |           | ref           |             | ref        |           | ref                |           | ref           |             |
|      | <b>ACPA low positive</b>    | 1.05       | 0.69-1.60 | 1.16               | 0.80-1.68 | 1.38          | 0.98-1.97   | 1.65       | 1.00-2.72 | 2.52               | 1.52-4.18 | 2.21          | 1.31-3.72   |
|      | <b>ACPA high positive</b>   | 1.49       | 1.24-1.79 | 1.41               | 1.15-1.72 | 1.38          | 1.11-1.71   | 1.17       | 0.90-1.52 | 1.45               | 1.11-1.90 | 1.25          | 0.93-1.69   |
|      | <b>Female gender</b>        | -          | -         | 0.71               | 0.60-0.84 | 0.81          | 0.67-0.98   | -          | -         | 0.71               | 0.55-0.91 | 0.73          | 0.55-0.97   |
|      | <b>Age at onset</b>         | -          | -         | 1.10               | 1.09-1.11 | 1.11          | 1.10-1.12   | -          | -         | 1.10               | 1.09-1.11 | 1.10          | 1.09-1.12   |
|      | <b>Smoking <i>Never</i></b> | -          | -         | -                  | -         | ref           |             | -          | -         | -                  | -         | ref           |             |
|      | <b><i>Previous</i></b>      |            |           |                    |           | 1.00          | 0.81-1.24   |            |           |                    |           | 1.04          | 0.73-1.48   |
|      | <b><i>Current</i></b>       |            |           |                    |           | 1.80          | 1.40-2.31   |            |           |                    |           | 1.86          | 1.35-2.56   |
|      | <b>Inclusion year</b>       | -          | -         | -                  | -         | 0.96          | 0.94-0.98   | -          | -         | -                  | -         | 0.97          | 0.93-1.01   |
|      | <b>Inflammatory marker</b>  | -          | -         | -                  | -         | 1.003         | 1.001-1.005 | -          | -         | -                  | -         | 1.006         | 1.001-1.011 |

HR, hazard ratio; CI, confidence interval; RF, rheumatoid factor; ACPA, anti-citrullinated peptide antibodies; inflammatory marker = C-reactive protein in NOAR, = erythrocyte sedimentation rate in EAC

\*adjusted for age at symptom onset, sex, baseline smoking status, year of inclusion in cohort & inflammatory marker

**Table S3** Comparison of RF or ACPA levels in tertiles

|                                                  | NOAR                 |           |                                |           | Leiden EAC           |           |                                |           |
|--------------------------------------------------|----------------------|-----------|--------------------------------|-----------|----------------------|-----------|--------------------------------|-----------|
|                                                  | Total EIA population |           | 2010 ACR/EULAR positive cohort |           | Total EIA population |           | 2010 ACR/EULAR positive cohort |           |
| RF:                                              | HR                   | 95% CI    | HR                             | 95%CI     | HR                   | 95% CI    | HR                             | 95%CI     |
| <b><i>Unadjusted</i><sup>†</sup></b>             |                      |           |                                |           |                      |           |                                |           |
| RF second tertile                                | 0.92                 | 0.69-1.23 | 0.73                           | 0.47-1.13 | 1.37                 | 0.96-1.94 | 1.03                           | 0.65-1.64 |
| RF third tertile                                 | 1.39                 | 0.19-1.63 | 1.21                           | 1.00-1.47 | 1.91                 | 1.47-2.49 | 1.40                           | 1.00-1.96 |
| <b><i>Age &amp; sex adjusted</i><sup>†</sup></b> |                      |           |                                |           |                      |           |                                |           |
| RF second tertile                                | 0.83                 | 0.62-1.10 | 0.85                           | 0.55-1.31 | 1.49                 | 1.05-2.12 | 1.46                           | 0.91-2.34 |
| RF third tertile                                 | 1.25                 | 1.07-1.47 | 1.14                           | 0.95-1.38 | 1.86                 | 1.43-2.42 | 1.90                           | 1.35-2.67 |
| <b><i>Multivariate</i><sup>†*</sup></b>          |                      |           |                                |           |                      |           |                                |           |
| RF second tertile                                | 1.16                 | 0.85-1.59 | 1.18                           | 0.74-1.90 | 1.53                 | 1.05-2.22 | 1.42                           | 0.87-2.32 |
| RF third tertile                                 | 1.29                 | 1.09-1.52 | 1.25                           | 1.03-1.53 | 1.66                 | 1.23-2.23 | 1.68                           | 1.17-2.43 |
| <b>ACPA:</b>                                     |                      |           |                                |           |                      |           |                                |           |
| <b><i>Unadjusted</i><sup>§</sup></b>             |                      |           |                                |           |                      |           |                                |           |
| ACPA second tertile                              | 1.04                 | 0.85-1.27 | 1.25                           | 0.94-1.66 | 1.22                 | 0.89-1.68 | 1.18                           | 0.78-1.78 |
| ACPA third tertile                               | 1.29                 | 1.06-1.57 | 1.31                           | 1.03-1.68 | 1.26                 | 0.91-1.73 | 0.82                           | 0.56-1.19 |
| <b><i>Age &amp; sex adjusted</i><sup>§</sup></b> |                      |           |                                |           |                      |           |                                |           |
| ACPA second tertile                              | 0.95                 | 0.77-1.16 | 1.16                           | 0.87-1.54 | 1.58                 | 1.15-2.18 | 1.58                           | 1.04-2.38 |
| ACPA third tertile                               | 1.18                 | 0.97-1.44 | 1.26                           | 0.99-1.61 | 1.77                 | 1.28-2.46 | 1.59                           | 1.08-2.34 |
| <b><i>Multivariate</i><sup>§*</sup></b>          |                      |           |                                |           |                      |           |                                |           |
| ACPA second tertile                              | 1.00                 | 0.81-1.25 | 1.24                           | 0.91-1.67 | 1.21                 | 0.84-1.74 | 1.22                           | 0.76-1.95 |
| ACPA third tertile                               | 1.19                 | 0.97-1.46 | 1.27                           | 0.98-1.63 | 1.30                 | 0.90-1.87 | 1.26                           | 0.81-1.95 |

HR, hazard ratio; CI, confidence interval; RF, rheumatoid factor; ACPA, anti-citrullinated protein antibodies; inflammatory marker = C-reactive protein in NOAR, = erythrocyte sedimentation rate in EAC

<sup>†</sup>RF first tertile was used as a reference group; <sup>§</sup>ACPA first tertile was used as a reference group

\*adjusted for age at symptom onset, sex, baseline smoking status, year of inclusion in cohort & inflammatory marker

**Table S4** Univariate and multivariate Cox proportional hazard models comparing RF&ACPA positive vs single positive & both antibodies negative

|                                 | NOAR       |           |                    |           |               |             | Leiden EAC |           |                    |           |               |             |
|---------------------------------|------------|-----------|--------------------|-----------|---------------|-------------|------------|-----------|--------------------|-----------|---------------|-------------|
|                                 | Unadjusted |           | Age & sex adjusted |           | Multivariate* |             | Unadjusted |           | Age & sex adjusted |           | Multivariate* |             |
|                                 | HR         | 95% CI    | HR                 | 95% CI    | HR            | 95% CI      | HR         | 95% CI    | HR                 | 95% CI    | HR            | 95% CI      |
| <b>Both antibodies negative</b> | ref        |           | ref                |           | ref           |             | ref        |           | ref                |           | ref           |             |
| <b>RF positive</b>              | 1.11       | 0.83-1.49 | 1.05               | 0.78-1.41 | 1.11          | 0.82-1.51   | 1.88       | 1.29-2.74 | 1.45               | 0.99-2.13 | 1.48          | 0.99-2.21   |
| <b>ACPA positive</b>            | 1.27       | 0.94-1.73 | 1.40               | 1.03-1.91 | 1.35          | 0.98-1.88   | 0.63       | 0.32-1.23 | 0.96               | 0.48-1.90 | 1.05          | 0.53-2.09   |
| <b>Both antibodies positive</b> | 1.51       | 1.23-1.84 | 1.38               | 1.11-1.72 | 1.35          | 1.09-1.68   | 1.59       | 1.21-2.09 | 1.82               | 1.38-2.40 | 1.57          | 1.15-2.14   |
| <b>Female gender</b>            | -          | -         | 0.72               | 0.61-0.85 | 0.81          | 0.67-0.98   | -          | -         | 0.72               | 0.57-0.93 | 0.74          | 0.55-0.98   |
| <b>Age at onset</b>             | -          | -         | 1.11               | 1.10-1.12 | 1.11          | 1.10-1.12   | -          | -         | 1.10               | 1.09-1.11 | 1.10          | 1.09-1.11   |
| <b>Smoking</b> <i>Never</i>     | -          | -         | -                  | -         | ref           |             | -          | -         | -                  | -         | ref           |             |
| <i>Previous</i>                 |            |           |                    |           | 1.00          | 0.81-1.24   |            |           |                    |           | 1.00          | 0.70-1.42   |
| <i>Current</i>                  |            |           |                    |           | 1.76          | 1.37-2.27   |            |           |                    |           | 1.82          | 1.31-2.51   |
| <b>Inclusion year</b>           | -          | -         | -                  | -         | 0.96          | 0.94-0.98   | -          | -         | -                  | -         | 0.96          | 0.93-1.00   |
| <b>Inflammatory marker</b>      | -          | -         | -                  | -         | 1.003         | 1.002-1.005 | -          | -         | -                  | -         | 1.005         | 1.000-1.010 |

HR, hazard ratio; CI, confidence interval, inflammatory marker = C-reactive protein in NOAR, = erythrocyte sedimentation rate in EAC

\*adjusted for age at symptom onset, sex, baseline smoking status, year of inclusion in cohort &amp; inflammatory marker

**Table S5** Sensitivity analysis with imputed data

|                                 | NOAR  |               |       |
|---------------------------------|-------|---------------|-------|
|                                 |       | Multivariate* |       |
|                                 | HR    | 95% CI        | FMI   |
| <b>Both antibodies negative</b> | ref   | -             | -     |
| <b>RF positive</b>              | 1.12  | 0.83-1.52     | 0.153 |
| <b>ACPA positive</b>            | 1.31  | 0.95-1.83     | 0.198 |
| <b>Both antibodies positive</b> | 1.38  | 1.13-1.68     | 0.101 |
| <b>Female gender</b>            | 0.76  | 0.65-0.90     | 0.002 |
| <b>Age at onset</b>             | 1.11  | 1.10-1.12     | 0.005 |
| <b>Smoking</b> <i>Never</i>     | ref   | -             |       |
| <i>Ever</i>                     | 0.97  | 0.80-1.18     | 0.001 |
| <i>Current</i>                  | 1.65  | 1.32-2.07     | 0.003 |
| <b>Inclusion year</b>           | 0.96  | 0.94-0.98     | 0.002 |
| <b>Inflammatory marker</b>      | 1.003 | 1.002-1.005   | 0.004 |

HR, hazard ratio; CI, confidence interval; FMI, fraction of missing information;  
inflammatory marker = C-reactive protein in NOAR

\*adjusted for age at symptom onset, sex, baseline smoking status, year of inclusion in cohort & inflammatory marker
